# Supplementary material
Source: MDPI journal article supplement (https://www.mdpi.com/2311-7524/9/2/285)
Supplement: s1 [file s1]

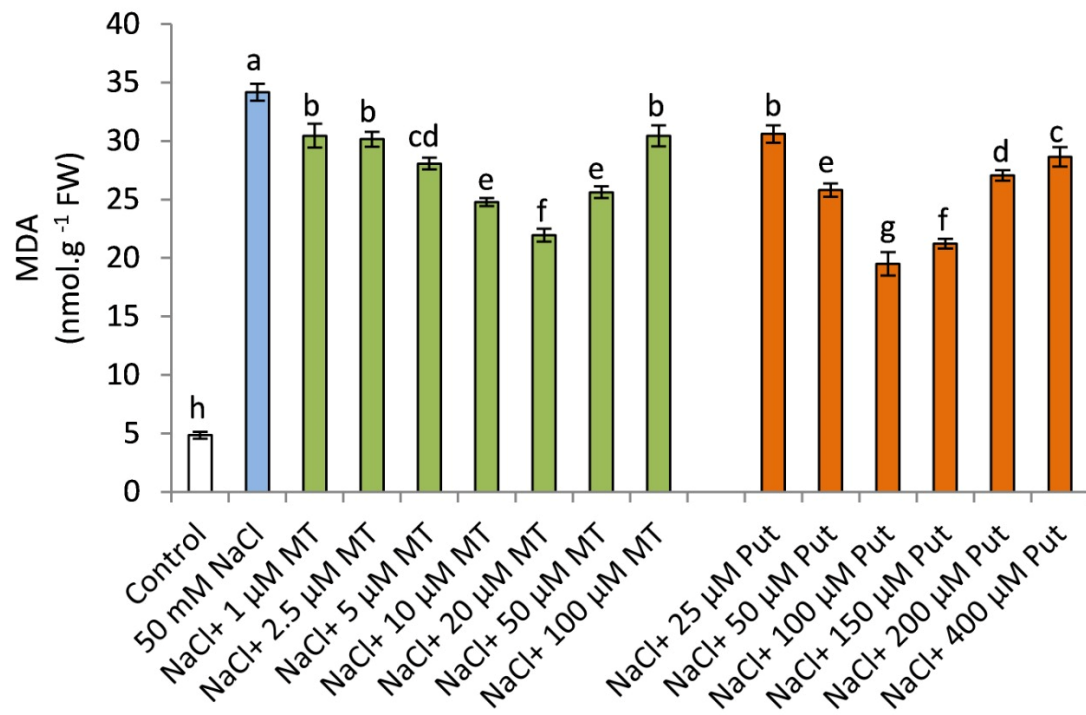

**Figure S1.** Effect of different concentrations of melatonin and putrescine on the membrane lipid oxidation of snap bean seedlings grown under control and salt stress (50 mM NaCl). The upper error bar denotes standard deviation, while various lowercase letters above the bars denote significant differences according to Duncan's multiple range tests ( $p \leq 0.05$ ).
